# Supplementary material
Source: publisher site journal article supplement (https://www.dovepress.com/article/462168)
Supplement: Supplementary file 1 [file get_supplementary_file.php]

**Table S1. Comparison of clinicopathologic variables between HCC patients with low or high tumor PVC.**

| **Variables** | **PVC ≤ 0.386**  **(n = 288)** | **PVC > 0.386 (n = 131)** | ***P*** |
| --- | --- | --- | --- |
| Sex |  |  | 0.665 |
| Male | 253 (87.8) | 117 (89.3) |  |
| Female | 35 (12.2) | 14 (10.7) |  |
| Age, years |  |  | 0.459 |
| ≤ 65 | 245 (85.1) | 115 (87.8) |  |
| > 65 | 43 (14.9) | 16 (12.2) |  |
| **ALBI grade** |  |  | **0.011** |
| **1** | **157 (54.5)** | **88 (67.2)** |  |
| **2** | **126 (43.8)** | **43 (32.8)** |  |
| **3** | **5 (1.7)** | **0 (0)** |  |
| Infection with hepatitis B and/or C virus |  |  | 0.246 |
| Positive | 234 (81.3) | 100 (76.3) |  |
| Negative | 54 (18.8) | 31 (23.7) |  |
| Liver cirrhosis |  |  | 0.056 |
| Positive | 203 (70.5) | 80 (61.1) |  |
| Negative | 85 (29.5) | 51 (38.9) |  |
| **α feto-protein, ng/ml** |  |  | **0.041** |
| **≥ 400** | **82 (28.5)** | **25 (19.1)** |  |
| **< 400** | **206 (71.5)** | **106 (80.9)** |  |
| **BCLC stage** |  |  | **0.016** |
| **0-A** | **146 (50.7)** | **83 (63.4)** |  |
| **B-C** | **142 (49.3)** | **48 (43.6)** |  |
| **Tumor differentiation** |  |  | **0.022** |
| **Good** | **5 (1.7)** | **3 (2.3)** |  |
| **Moderate** | **55 (19.1)** | **38 (29.0)** |  |
| **Poor** | **228 (79.2)** | **90 (68.7)** |  |
| **Microvascular invasion** |  |  | **0.012** |
| **M0** | **124 (43.1)** | **75 (57.3)** |  |
| **M1** | **100 (34.7)** | **34 (26.0)** |  |
| **M2** | **64 (22.2)** | **22 (16.8)** |  |
| Satellite nodules |  |  | 0.571 |
| Positive | 34 (11.8) | 13 (9.9) |  |
| Negative | 254 (88.2) | 118 (90.1) |  |
| Lymph node metastasis |  |  | 0.212 |
| Positive | 3 (1.0) | 4 (3.1) |  |
| Negative | 285 (99.0) | 127 (96.9) |  |

Characteristics differing significantly between the groups are indicated in **bold**.

ALBI, albumin and total bilirubin; BCLC, Barcelona Clinic Liver Cancer; HCC, hepatocellular carcinoma; PVC, portal venous coefficient.

**Table S2. Comparison of clinicopathologic variables between HCC patients with low or high tumor HAC.**

| **Variables** | **HAC ≤ 0.029**  **(n = 126)** | **HAC > 0.029 (n = 293)** | ***P*** |
| --- | --- | --- | --- |
| Sex |  |  | 0.930 |
| Male | 111 (88.1) | 259 (88.4) |  |
| Female | 15 (11.9) | 34 (11.6) |  |
| Age, years |  |  | 0.820 |
| ≤ 65 | 109 (86.5) | 251 (85.7) |  |
| > 65 | 17 (13.5) | 42 (14.3) |  |
| ALBI grade |  |  | 0.714 |
| 1 | 73 (57.9) | 172 (58.7) |  |
| 2 | 49 (38.9) | 120 (41.0) |  |
| 3 | 4 (3.2) | 1 (0.3) |  |
| Infection with hepatitis B and/or C virus |  |  | 0.346 |
| Positive | 104 (82.5) | 230 (78.5) |  |
| Negative | 22 (17.5) | 63 (21.5) |  |
| Liver cirrhosis |  |  | 0.802 |
| Positive | 84 (66.7) | 199 (67.9) |  |
| Negative | 42 (33.3) | 94 (32.1) |  |
| α feto-protein, ng/ml |  |  | 0.841 |
| ≥ 400 | 33 (26.2) | 74 (25.3) |  |
| < 400 | 93 (73.8) | 219 (74.7) |  |
| BCLC stage |  |  | 0.808 |
| 0-A | 70 (55.6) | 159 (54.3) |  |
| B-C | 56 (44.4) | 134 (45.7) |  |
| Tumor differentiation |  |  | 0.755 |
| Good | 1 (0.8) | 7 (2.4) |  |
| Moderate | 31 (24.6) | 62 (21.2) |  |
| Poor | 94 (74.6) | 224 (76.5) |  |
| Microvascular invasion |  |  | 0.201 |
| M0 | 66 (52.4) | 133 (45.4) |  |
| M1 | 37 (29.4) | 97 (33.1) |  |
| M2 | 23 (18.3) | 63 (21.5) |  |
| Satellite nodules |  |  | 0.964 |
| Positive | 14 (11.1) | 33 (11.3) |  |
| Negative | 112 (88.9) | 260 (88.7) |  |
| Lymph node metastasis |  |  | 0.680 |
| Positive | 1 (0.8) | 6 (2.0) |  |
| Negative | 125 (99.2) | 287 (98.0) |  |

ALBI, albumin and total bilirubin; BCLC, Barcelona Clinic Liver Cancer; HAC, hepatic arterial coefficient; HCC, hepatocellular carcinoma.
